# Supplementary material for: ATP-Dependent C–F Bond Cleavage Allows the Complete Degradation of 4-Fluoroaromatics without Oxygen
Source: PubMed Central journal article supplement (PMC4992971; doi:10.1128/mbio.00990-16), 2016-08-09
Supplement: mbo004162938sf1.pdf [file mbo004162938sf1.pdf]

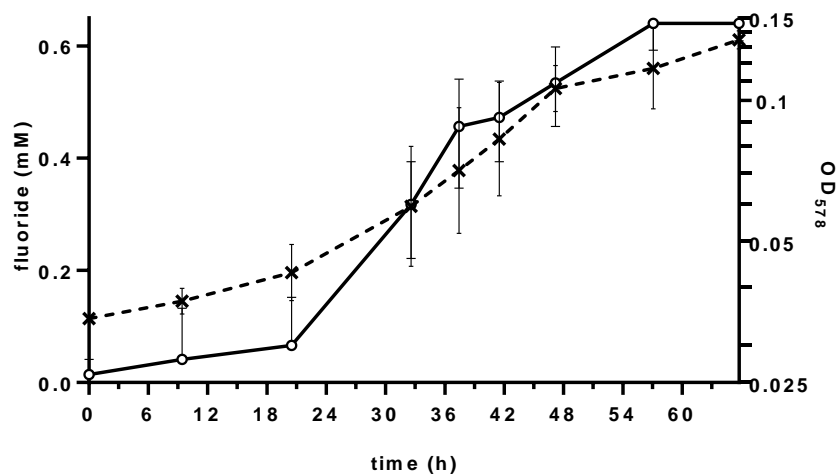

**Supplementary Figure S1** Growth of *T. aromatica* K172 with 4-fluorotoluene (—○—) OD<sub>578</sub>, (--x--) concentration of free fluoride; number of biological replicates: 2; doubling time 16.2 h
