# Supplementary material for: ATP-Dependent C–F Bond Cleavage Allows the Complete Degradation of 4-Fluoroaromatics without Oxygen
Source: PubMed Central journal article supplement (PMC4992971; doi:10.1128/mbio.00990-16), 2016-08-09
Supplement: mbo004162938st1.pdf [file mbo004162938st1.pdf]

**Supplemental Table S1** Determination of 4-F-benzoate consumption, fluoride release and growth yield at different time points during anaerobic degradation of 4-F-benzoate by *T. aromatica*.

| <b>time (h)</b> | <b>4-F-benzoate consumed (mmol)</b> | <b>fluoride released (mmol)</b> | <b>growth yield (g cells [dry weight] per mol 4-F-benzoate consumed)</b> |
|-----------------|-------------------------------------|---------------------------------|--------------------------------------------------------------------------|
| 6,7             | 19,7                                | 19,1                            | 33,3                                                                     |
| 9,2             | 41,7                                | 39,4                            | 33,7                                                                     |
| 11,8            | 60,8                                | 49,1                            | 35,4                                                                     |
| 13,3            | 69,0                                | 87,2                            | 41,2                                                                     |
| 22,0            | 229,3                               | 219,5                           | 35,6                                                                     |
| 24,5            | 267,6                               | 244,4                           | 35,4                                                                     |
