# Supplementary material for: ATP-Dependent C–F Bond Cleavage Allows the Complete Degradation of 4-Fluoroaromatics without Oxygen
Source: PubMed Central journal article supplement (PMC4992971; doi:10.1128/mbio.00990-16), 2016-08-09
Supplement: mbo004162938st3.pdf [file mbo004162938st3.pdf]

**Supplementary Table S3** Oligonucleotide primers used for quantitative RT-PCR analyses.

| <b>Primer pair 5'→3'</b>                     | <b>Target annotation</b>                                                 |
|----------------------------------------------|--------------------------------------------------------------------------|
| AGCGTGCGAAGAAAATC<br>TCGACGACCTTCTTCTC       | F0F1 ATP synthase beta subunit<br>(housekeeping control 1)               |
| ACGTAGATCAGGGTGTTG<br>GTTTCCTGCGCTCTTAT      | rod shape-determining protein MreB<br>(housekeeping control 2)           |
| TGGTGGAGCTGTAGTAGATA<br>AGGTCAGCATCTTCCAT    | succinate dehydrogenase flavoprotein<br>subunit (housekeeping control 3) |
| ACTTCTTGAGCTCTTCGTAC<br>GACTACAGCCAGATCTACAA | nitrate reductase Z alpha subunit<br>(housekeeping control 4)            |
| AACTTCCAGATGAACGAC<br>GACTTGGTCGACTTCATC     | benzoyl-CoA reductase alpha subunit                                      |
| CATGAAGGAAGAGAAGTACC<br>GTAGAACAGCTTCCAGAACT | benzoyl-CoA reductase beta subunit                                       |
| CATGAAGGAAGAGAAGTACC<br>GTAGAACAGCTTCCAGAACT | benzoyl-CoA reductase gamma subunit                                      |
| CATGAAGGAAGAGAAGTACC<br>GTAGAACAGCTTCCAGAACT | benzoyl-CoA reductase delta subunit                                      |
| AGATTCCGGAGCGCTACAAC<br>CATCGTAGGTGTAGGAGCCG | benzoate:CoA ligase                                                      |
