# Supplementary material for: ATP-Dependent C–F Bond Cleavage Allows the Complete Degradation of 4-Fluoroaromatics without Oxygen
Source: PubMed Central journal article supplement (PMC4992971; doi:10.1128/mbio.00990-16), 2016-08-09
Supplement: mbo004162938st4.pdf [file mbo004162938st4.pdf]

**Supplemental Table S4** Parameters of LC-MS analyses of proteomes.

| <b>Reversed phase liquid chromatography (RP-LC)</b> |                                                                                                                       |
|-----------------------------------------------------|-----------------------------------------------------------------------------------------------------------------------|
| Instrument                                          | Ultimate 3000 RSLC (Dionex, Idstein, Germany)                                                                         |
| trap column                                         | 75 $\mu\text{m}$ inner diameter, packed with 3 $\mu\text{m}$ C18 particles (Acclaim PepMap100, Thermo Scientific)     |
| analytical column                                   | 15 cm analytical column packed with 2 $\mu\text{m}$ C18 particles (Acclaim PepMap RSLC, Thermo Scientific)            |
| buffer system                                       | binary buffer system consisting of 0.1% formic acid, 2% ACN (buffer A) and 0.08% formic acid in 80% ACN in (buffer B) |
| flow rate                                           | 300 nl/min                                                                                                            |
| Gradient                                            | linear gradient of buffer B from 4% up to 55%                                                                         |
| gradient duration                                   | 60 min                                                                                                                |
| column oven temperature                             | 35°C                                                                                                                  |

| <b>Mass spectrometry (MS)</b>                  |                                                                                                      |
|------------------------------------------------|------------------------------------------------------------------------------------------------------|
| instrument                                     | Orbitrap Fusion mass spectrometer (Thermo Scientific)                                                |
| electrospray                                   | via TriVersa NanoMate (Advion Biosciences, Norwich, UK)                                              |
| operation mode                                 | data-dependent                                                                                       |
| MS scan resolution                             | 120,000                                                                                              |
| MS ion target value                            | 4e5                                                                                                  |
| maximum ion injection time for the MS scan     | 60 ms                                                                                                |
| selection for MS/MS                            | Top Speed 3 sec cycle time - most intense isotope patterns with charge $\geq 2$ from the survey scan |
| isolation window                               | 1.6 $m/z$                                                                                            |
| dissociation mode                              | higher energy collisional dissociation (HCD)                                                         |
| normalized collision energy                    | 28%                                                                                                  |
| maximum ion injection time for the MS/MS scans | 150 ms                                                                                               |
| MS/MS ion target value                         | 50,000                                                                                               |
| dynamic exclusion                              | 30 s                                                                                                 |
| MS/MS operation mode                           | centroid mode                                                                                        |
